# Supplementary material for: A dual-responsive luminescent metal–organic framework as a recyclable luminescent probe for the highly effective detection of pyrophosphate and nitrofurantoin
Source: Royal Society of Chemistry journal article supplement (doi:10.1039/c9an00718k), 2019-01-01
Supplement: c9an00718k1.pdf [file c9an00718k1.pdf]

## Supporting Information

### **A dual-responsive luminescent metal-organic framework as a recyclable luminescent probe for highly effective detecting pyrophosphate and nitrofurantoin**

Hui Li,<sup>a</sup> Jie Ren,<sup>a</sup> Xiufang Xu,<sup>a</sup> Liangmin Ning,<sup>a</sup> Ruoyan Tong,<sup>a</sup> Yao Song,<sup>a</sup> Shengyun Liao,<sup>\*b</sup>

Wen Gu,<sup>\*a</sup> Xin Liu<sup>\*a</sup>

<sup>a</sup> Collaborative Innovation Center of Chemical Science and Engineering, Key Laboratory of Advanced Energy Materials Chemistry (MOE), College of Chemistry, Nankai University, Tianjin 300071. Email: liuxin64@nankai.edu.cn; guwen68@nankai.edu.cn.

<sup>b</sup> Tianjin Key Laboratory of Organic Solar Cells and Photochemical Conversion, School of Chemistry and Chemical Engineering, Tianjin University of Technology, No. 391 Binshuixi Road, Tianjin 300384. Email: 18202587221@163.com.

## X-ray Structure Determination

The crystallographic data of the ZTMOF-1 was collected using a Bruker SMARTAPEX CCD diffractometer with MoK $\alpha$  radiation ( $\lambda = 0.71073 \text{ \AA}$ ). The crystal structure was successfully solved by the direct method and refined by full-matrix least-squares techniques based on  $F^2$  values with Shelxtl-2014.<sup>1</sup> And the non-hydrogen atoms were refined by anisotropic thermal parameters. The detailed crystallographic data and structure refinement parameters for ZTMOF-1 were summarized in Table S1 and Table S2 in supporting information.

**Table S1.** Selected bond distances ( $\text{\AA}$ ) and angles ( $^\circ$ ) for ZTMOF-1.

|                      |            |                      |            |
|----------------------|------------|----------------------|------------|
| Zn(1)-N(2)#1         | 2.064(4)   | Zn(1)-O(1)           | 1.965(4)   |
| Zn(1)-O(4)#2         | 2.020(4)   | Zn(1)-N(3)#1         | 2.141(4)   |
| Zn(1)-N(1)#1         | 2.175(5)   | N(2)-Zn(1)#3         | 2.064(4)   |
| O(4)-Zn(1)#4         | 2.020(4)   | N(3)-Zn(1)#3         | 2.141(4)   |
| N(1)-Zn(1)#3         | 2.175(5)   |                      |            |
| N(2)#1-Zn(1)-N(3)#1  | 76.74(17)  | N(2)#1-Zn(1)-N(1)#1  | 74.90(16)  |
| N(2)#1-Zn(1)-C(21)#2 | 119.13(17) | O(1)-Zn(1)-N(2)#1    | 117.22(16) |
| O(1)-Zn(1)-O(4)#2    | 94.48(17)  | O(1)-Zn(1)-N(3)#1    | 101.62(18) |
| O(1)-Zn(1)-N(1)#1    | 96.57(18)  | O(1)-Zn(1)-C(21)#2   | 123.26(18) |
| O(4)#2-Zn(1)-N(2)#1  | 147.40(17) | O(4)#2-Zn(1)-N(3)#1  | 105.61(18) |
| O(4)#2-Zn(1)-N(1)#1  | 95.16(17)  | O(4)#2-Zn(1) C(21)#2 | 28.79(16)  |
| N(3)#1-Zn(1)-N(1)#1  | 151.01(17) | N(3)#1-Zn(1)C(21)#2  | 96.88(18)  |
| N(1)#1-Zn(1) C(21)#2 | 91.68(17)  |                      |            |

**Table S2.** Crystal data and structure refinements parameters of the ZTMOF-1

|                                         |                                                                  |
|-----------------------------------------|------------------------------------------------------------------|
| Compound                                | ZTMOF-1                                                          |
| Empirical formula                       | C <sub>23</sub> H <sub>13</sub> N <sub>3</sub> O <sub>4</sub> Zn |
| Formula weight                          | 460.73                                                           |
| Crystal system                          | Tetragonal                                                       |
| Space group                             | I4(1)/acd                                                        |
| a (Å)                                   | 29.028(6)                                                        |
| b (Å)                                   | 29.028(6)                                                        |
| c (Å)                                   | 26.747(8)                                                        |
| α (°)                                   | 90                                                               |
| β (°)                                   | 90                                                               |
| γ (°)                                   | 90                                                               |
| V (Å <sup>3</sup> )                     | 22537(12)                                                        |
| Z                                       | 32                                                               |
| D <sub>calc</sub> (g cm <sup>-3</sup> ) | 1.086                                                            |
| Theta range (°)                         | 3.046-27.552                                                     |
| R(int)                                  | 0.0999                                                           |
| GOF on F <sup>2</sup>                   | 1.106                                                            |
| R1, wR2 [I > 2σ(I)]                     | 0.0703, 0.2081                                                   |
| R1, wR2 (all data)                      | 0.1232, 0.2424                                                   |

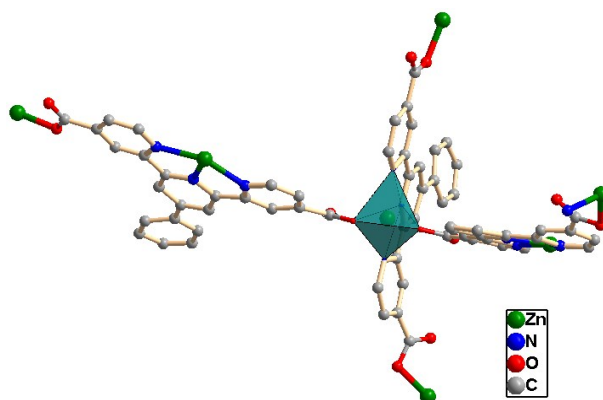

**Figure S1.** Coordination environment of the  $\text{Zn}^{2+}$  and ligands. (all the H atoms omitted for clarity.)

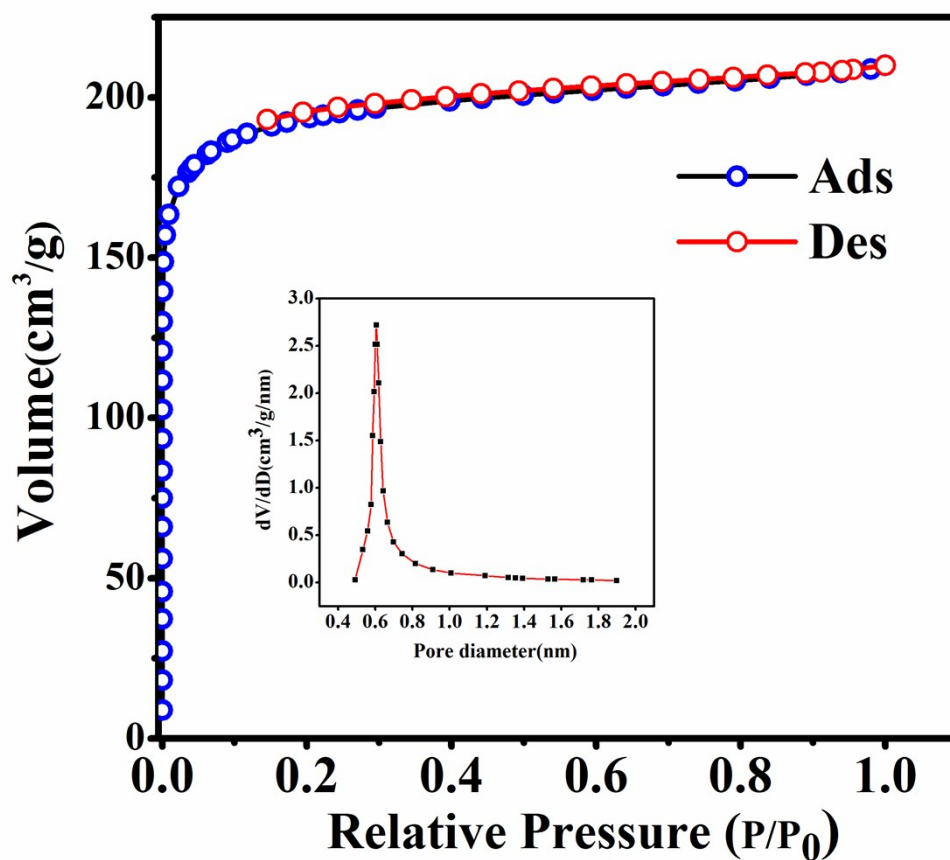

**Figure S2:**  $\text{N}_2$  adsorption/desorption isotherms and pore size distribution of the ZTMOF-1.

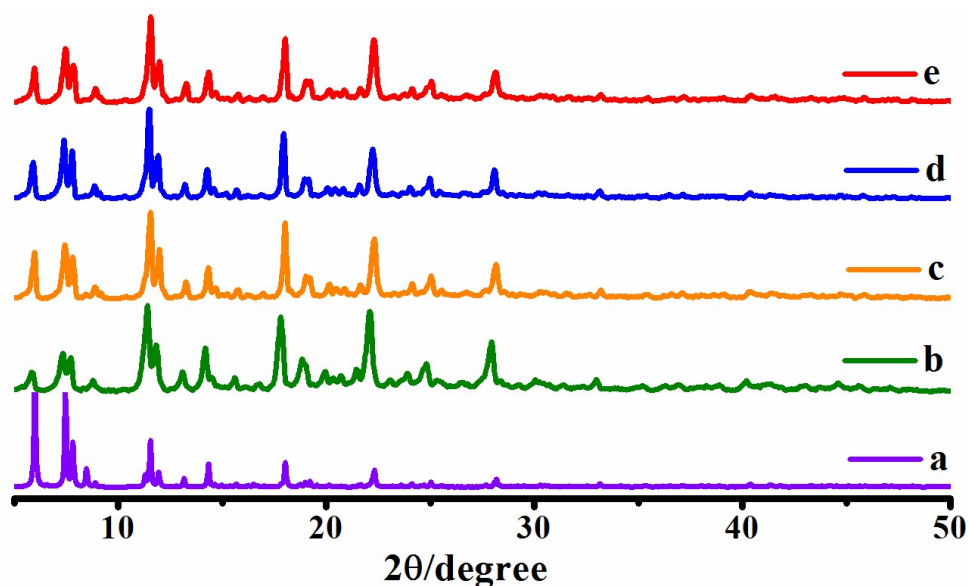

**Figure S3.** Powder X-ray diffraction(XRD) patterns of ZTMOF-1, (a) the simulated pattern of ZTMOF-1 (b) after immersing in aqueous solution of PPI for 48h (c) after immersing in buffer solution of PPI for 48h (d) after immersing in aqueous solution of nitrofurantoin for 48h.

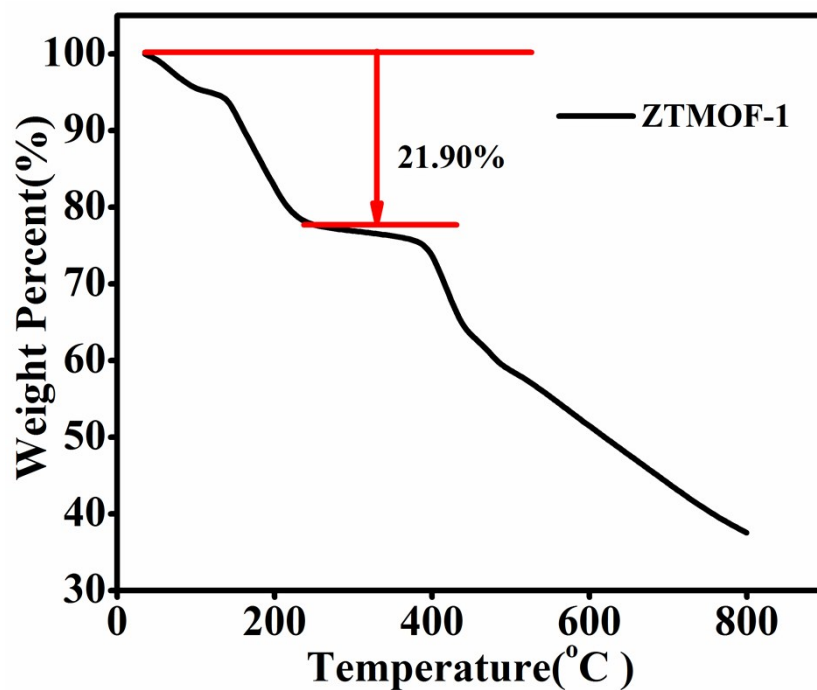

**Figure S4.** TGA curve of ZTMOF-1.

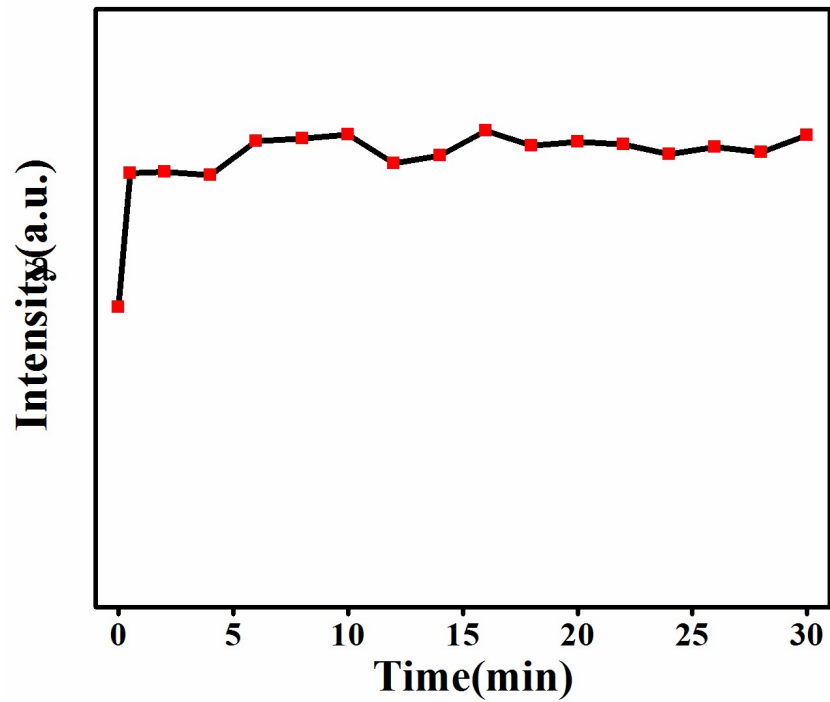

**Figure S5:** Emission intensity of the ZTMOF-1 at different time.

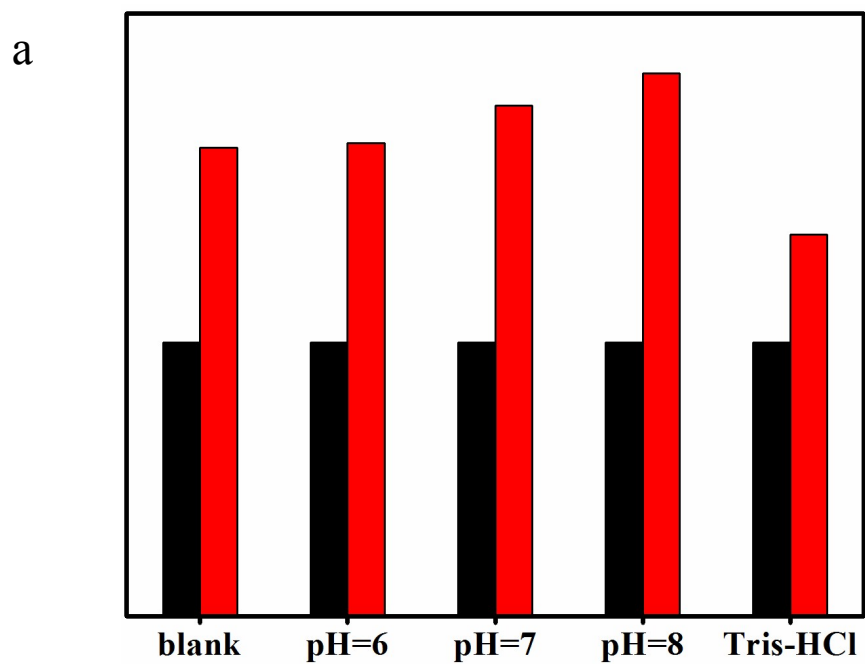

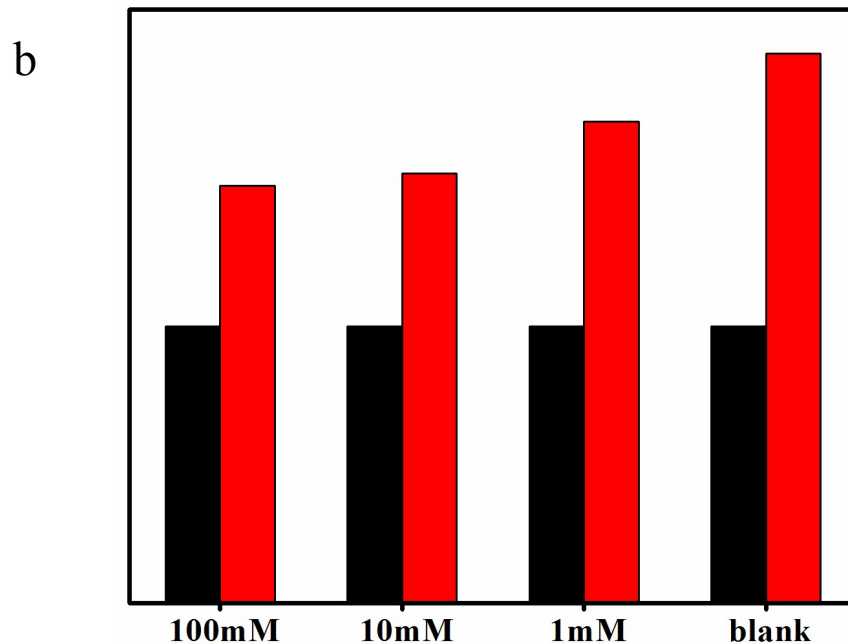

**Figure S6.** Change of emission intensity of the ZTMOF-1 (a) in aqueous solution with different pH. (b) in Tris-HCl buffer solution with different concentrations excitation at 344 nm.

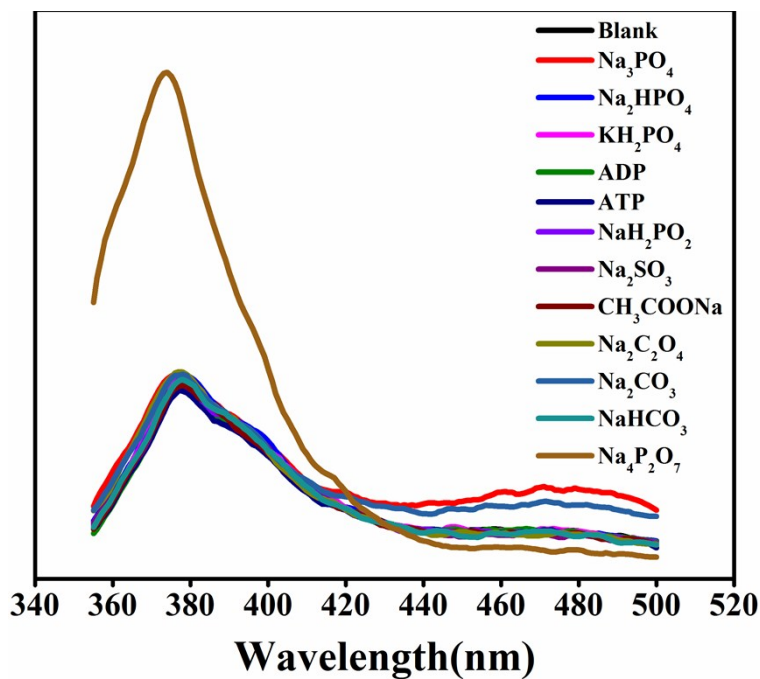

**Figure S7.** Emission spectra of ZTMOF-1 in different anionic solution (100  $\mu$ M) excitation at 344 nm.

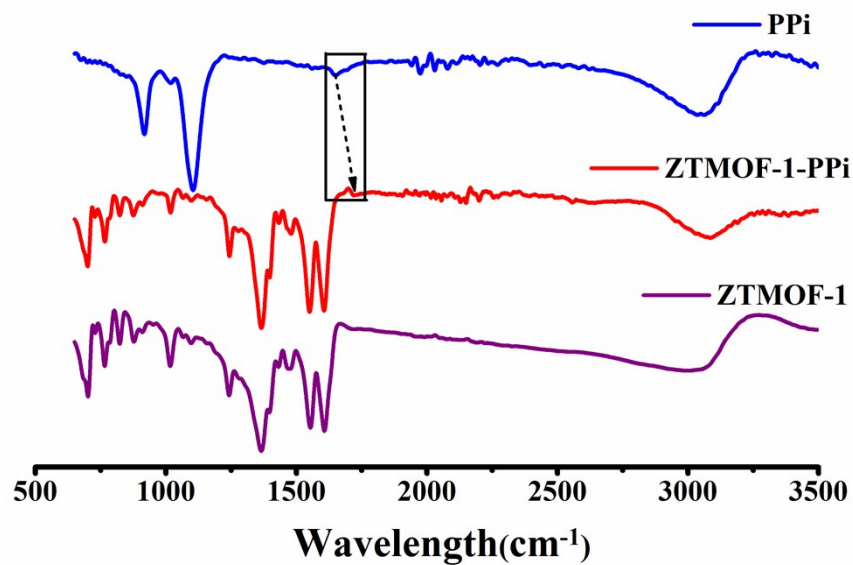

**Figure S8** FT-IR spectra of ppi (top), ZTMOF-1(bottom) and ZTMOF-1 treated with PPI (middle).

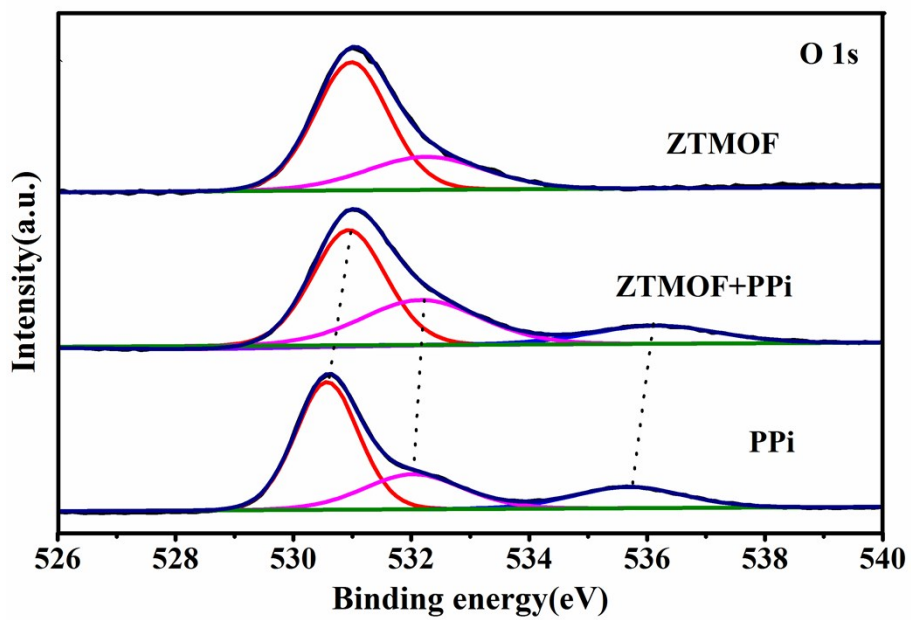

**Figure S9.** O 1s XPS spectra of ZTMOF, ZTMOF+PPI and PPI.



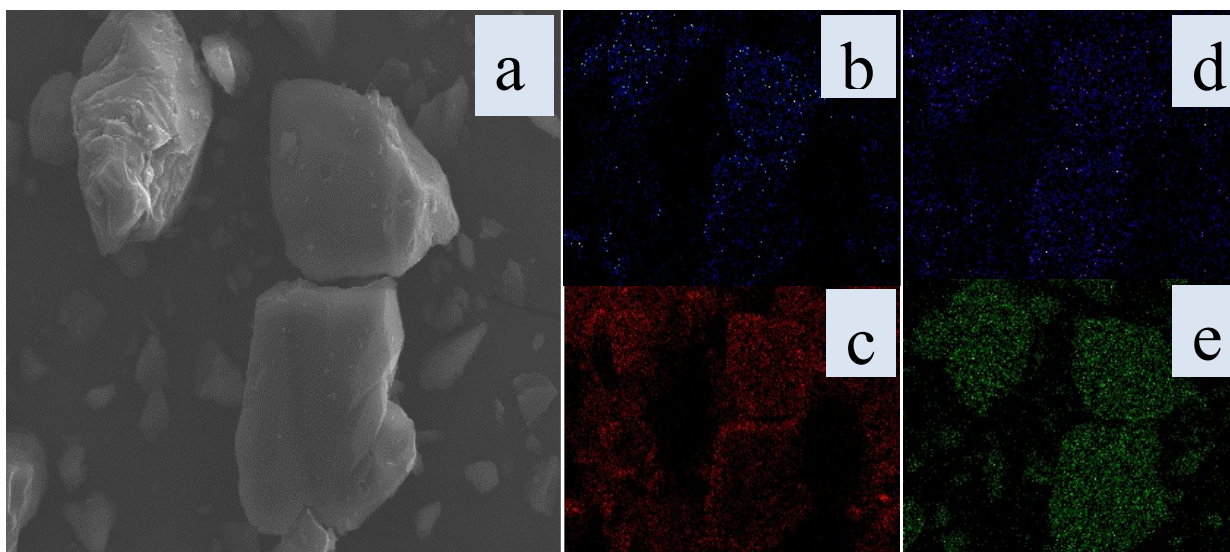

**Figure S10.** SEM images (a) ZTMOF-1 image (b) N mapping (c) O mapping (d) P mapping (e) Zn mapping.

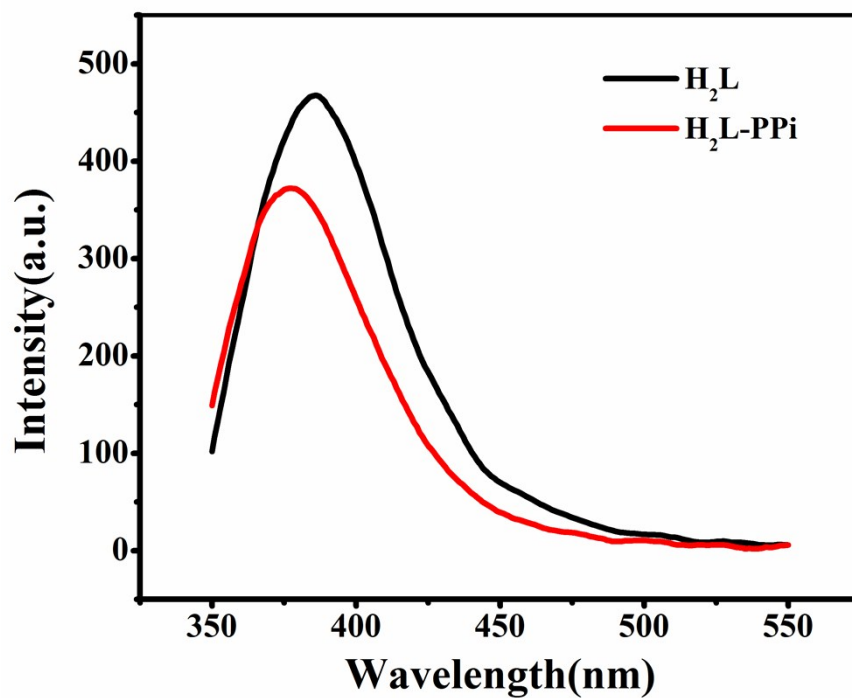

**Figure S11.** Emission spectra of the H<sub>2</sub>L(black line) and H<sub>2</sub>L with 400 $\mu$ M PPI(red line).

**Table S3.** Comparison of different PPI detection methods

| Materials                                                             | Method                                                                                                                                                                                                                                                         | Sensitivity  | cyclicality         | References       |
|-----------------------------------------------------------------------|----------------------------------------------------------------------------------------------------------------------------------------------------------------------------------------------------------------------------------------------------------------|--------------|---------------------|------------------|
| Probe 1+<br>graphene oxide<br>(GO) complex                            | Synthesis Probe 1 through three steps of complex chemical reaction then Probe 1 was added to form complexes used for PPI sensing.                                                                                                                              | 2.1 $\mu$ M  | unclear             | 2                |
| carbon dots<br>(CDs)/Pb <sup>2+</sup><br>complex                      | CDs was synthesized by hydrothermal method and then Pb <sup>2+</sup> was added to form complex which is used for PPI sensing.                                                                                                                                  | 54 nM        | unclear             | 3                |
| Eu(DPA) <sub>3</sub> @<br>Lap/<br>Cu <sup>2+</sup><br>complex         | Eu(DPA) <sub>3</sub> @Lap was prepared via ion exchange and coordination and then it was mixed with Cu <sup>2+</sup> to form complex which is used for PPI sensing.                                                                                            | unclear      | unclear             | 4                |
| N-doped carbon<br>quantum dots<br>(NCQDs)/Fe <sup>3+</sup><br>complex | N-CQDs was prepared via a simple bottom-up electrochemical (EC) method and then Fe <sup>3+</sup> was introduced to form complex which is used for PPI sensing.                                                                                                 | 0.5 $\mu$ M  | unclear             | 5                |
| MoOx QDs-<br>Fe <sup>3+</sup> complex                                 | MoOx QDs was prepared via one-step stirring strategy and then Fe <sup>3+</sup> was introduced to form complex which is used for PPI sensing.                                                                                                                   | 3.3 $\mu$ M  | unclear             | 6                |
| metal-organic<br>framework(MI<br>L-101(Cr))                           | luminol-embedded MIL-101 was prepared via solvothermal method, and hydrogen peroxide introduced which could increase the intensity of the MOF gradually, but PPI can inhibit the decomposition of H <sub>2</sub> O <sub>2</sub> which is used for PPI sensing. | 1.2 $\mu$ M  | unclear             | 7                |
| ZTMOF-1                                                               | ZTMOF-1 was prepared via solvothermal method, and PPI could increase the intensity of the MOF gradually.                                                                                                                                                       | 2.61 $\mu$ M | At less 5<br>cycles | <b>this work</b> |

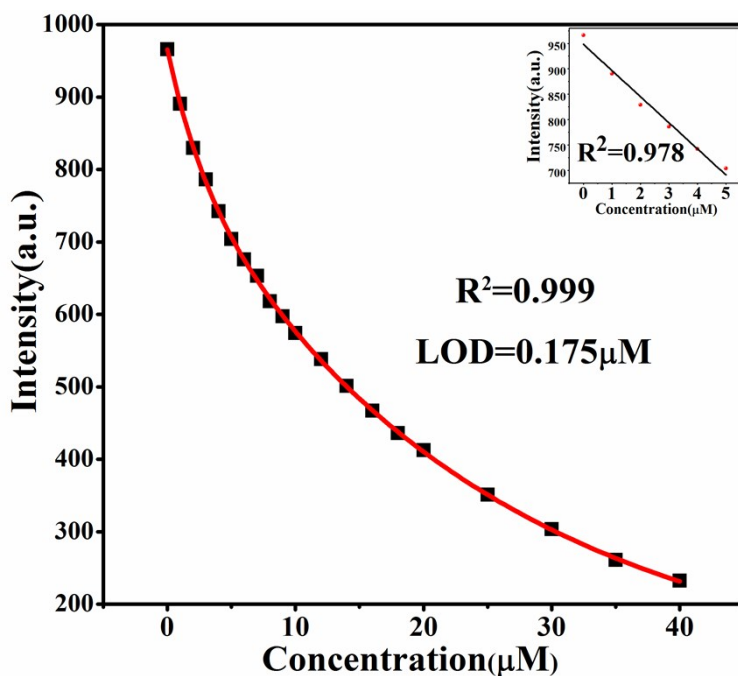

**Figure S12.** Relationship of the emission intensity of ZTMOF-1 and nitrofurantoin concentration from 0-40 μM.

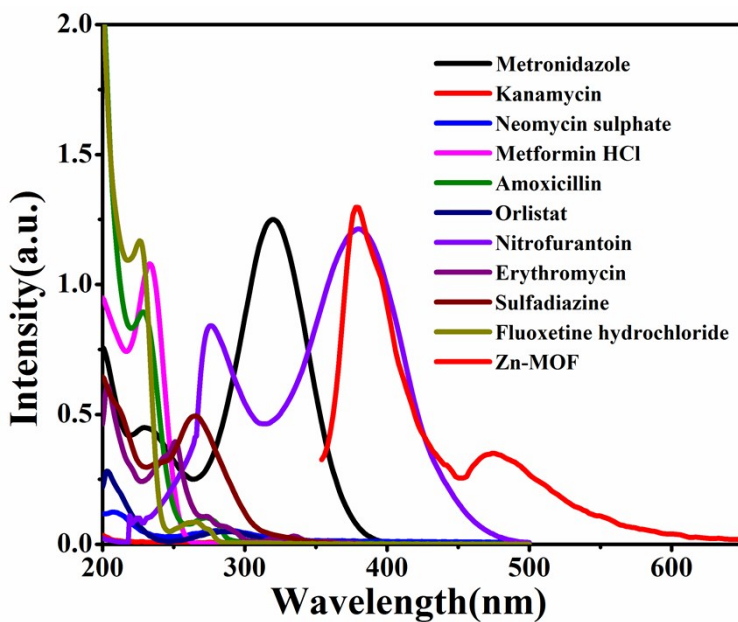

**Figure S13.** UV-visible spectra of the drugs and emission spectrum of the ZTMOF-1.

References:

1. G. A. Sheldrick, *Sect. A: Found Crystallogr.* **2008**, *64*, 112-122.
2. D. N. Lee, J. Kim, J. G. Jang, J. I. Hong, *Sens. Actuators. B*, **2017**, *252*, 706-711.
3. Y. Liu, Q. Zhou, Y. Yuan, Y. Wu, *Carbon*, **2017**, *115*, 550-560.
4. S. Wang, S. Lu, J. Sun, X. Yang, *Nanoscale*, **2018**, *10*, 7163-7170.
5. F. Niu, Y. L. Ying, X. Hua, Y. Niu, Y. Xu, Y. T. Long, *Carbon*, **2018**, *127*, 340-348.
6. L. L. Yuan, Y. S. Niu, R. G. Li, L. H. Zheng, Y. Wang, M. L. Liu, G. F. Xu, L. Huang, Y. H. Xu, *J. Mater. Chem. B*, **2018**, *6*, 3240-3245.
7. H. L. Yu, D. Y. Long, *Microchim Acta*, **2016**, *183*, 3151-3157.
